# Supplementary material for: Effect of Air Purification Systems on Particulate Matter and Airborne Bacteria in Public Buses
Source: MDPI journal article supplement (doi:10.3390/atmos13010055), 2021-12-30
Supplement: s1 [file s1]

Archive with 1 entries (1 files):
- atmosphere-1518251-supplementary.pdf
