# Supplementary material for: Effect of Air Purification Systems on Particulate Matter and Airborne Bacteria in Public Buses
Source: MDPI journal article supplement (doi:10.3390/atmos13010055), 2021-12-30
Supplement: s1 [file s1 › atmosphere-1518251-supplementary.pdf]

# Supplementary Materials: Effect of Air Purification Systems on Particulate Matter and Airborne Bacteria in Public Buses

Jae Jung Lee <sup>1,2,†</sup>, Hyemin Hwang <sup>2,†</sup>, Suk Chan Hong <sup>2</sup> and Jae Young Lee <sup>2,\*</sup>

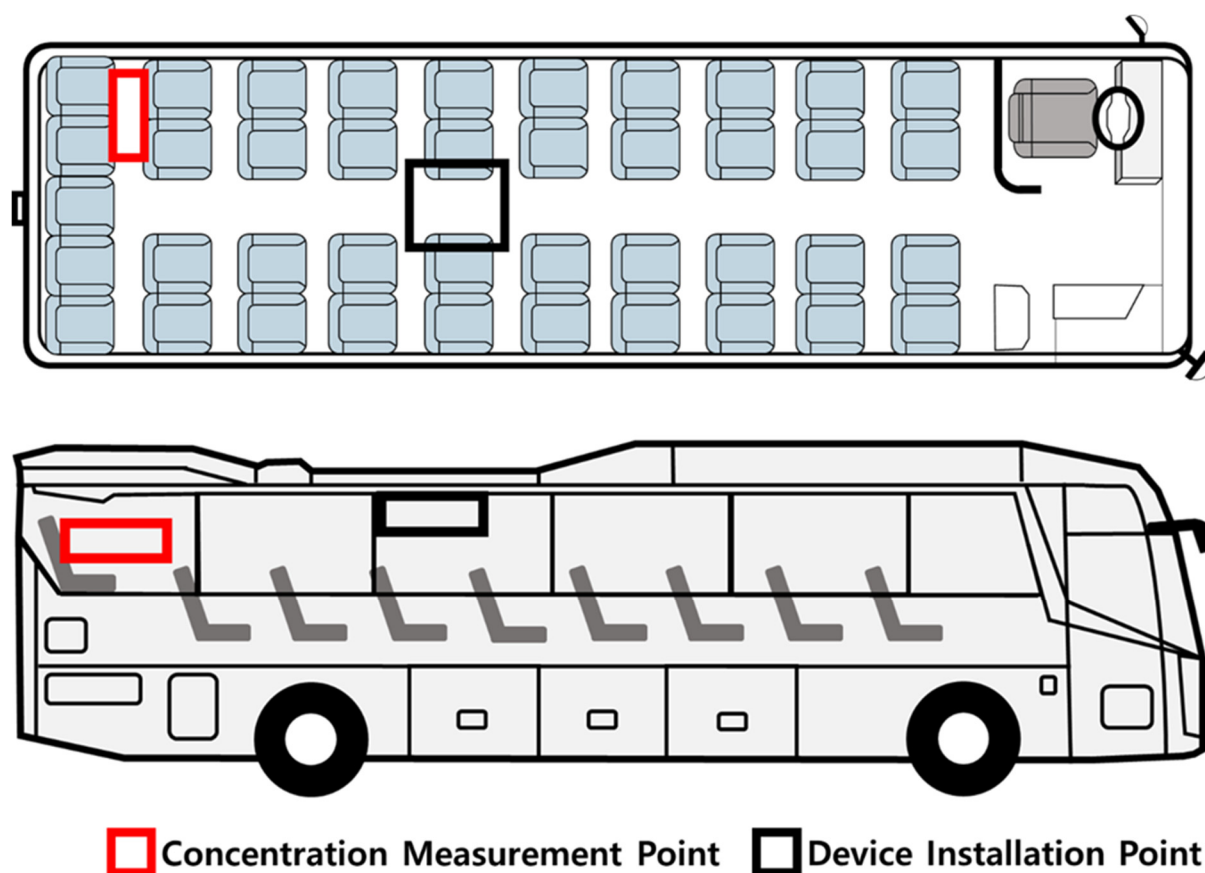

**Figure S1.** The location of air purification system and air quality measurements in top and side views.

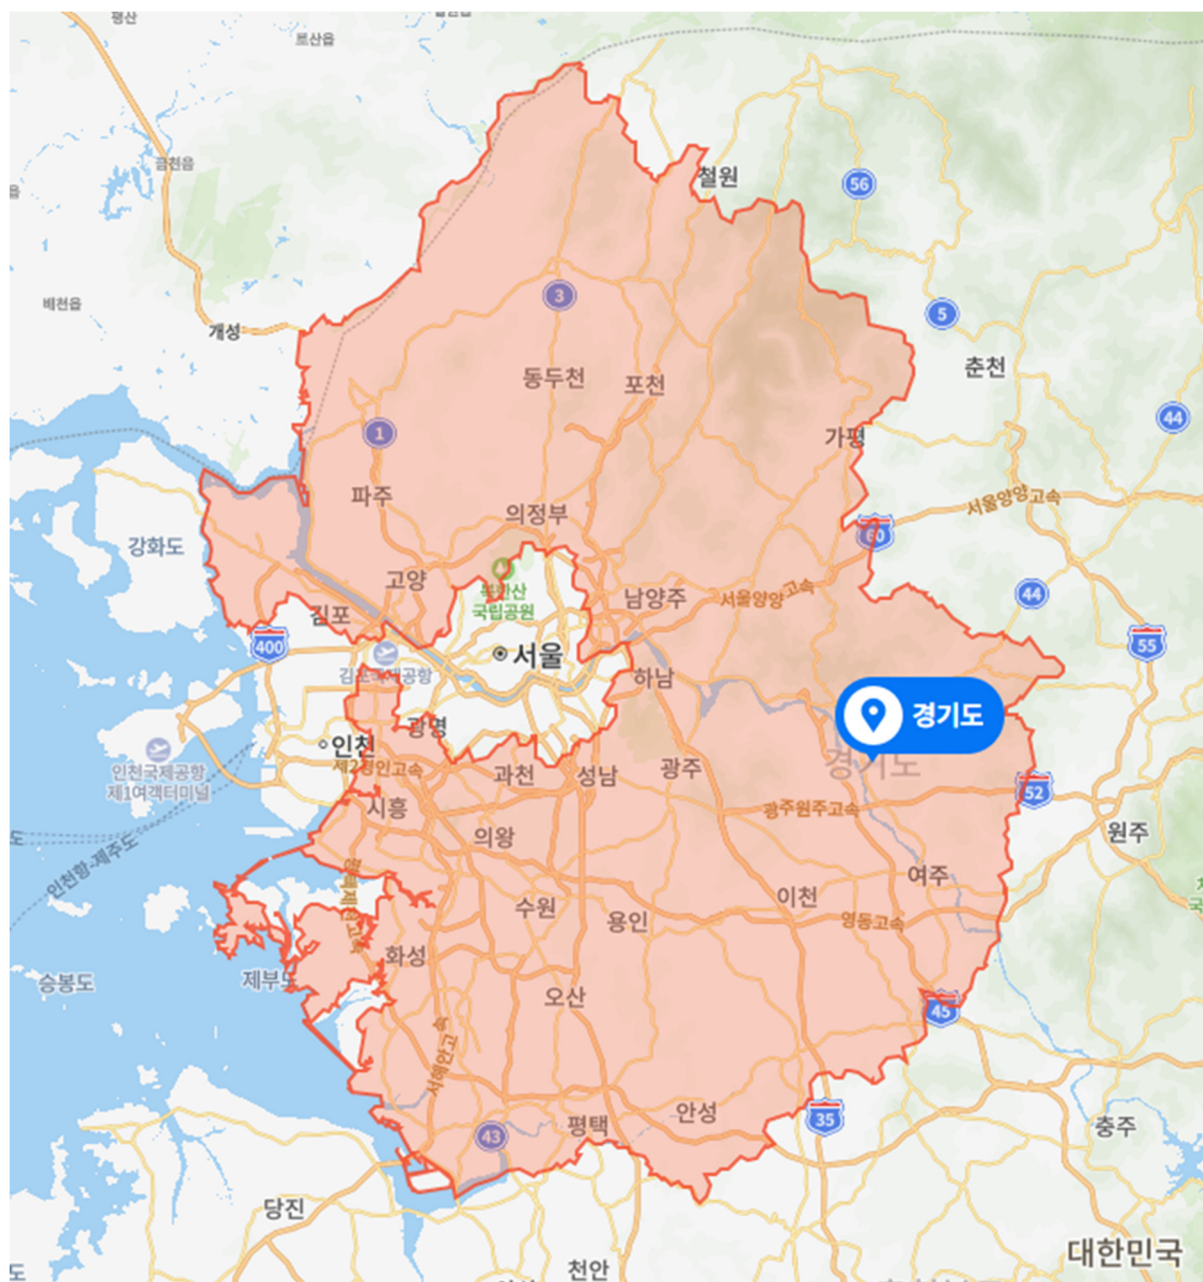

**Figure S2.** The map of Gyeonggi Province along with three selected intercity bus routes (from NAVER maps).

**Table S1.** General information on the intercity buses selected for air quality measurement.

| <b>Intercity bus</b> | <b>Air purification</b> | <b>Date of measurement</b> | <b>Departure</b>                      | <b>Arrival</b>                       | <b>Travel length</b> |
|----------------------|-------------------------|----------------------------|---------------------------------------|--------------------------------------|----------------------|
| BUS1-1               | On                      | 5/4                        | Dong Seoul Bus Terminal<br>at 8:50am  | Gamgok Bus Terminal<br>at 10:26 am   | 90.5 km              |
| BUS1-2               | Off                     | 5/4                        | Dong Seoul Bus Terminal<br>at 9:10am  | Gamgok Bus Terminal<br>at 10:44 am   | 90.5 km              |
| BUS2-1               | On                      | 4/29                       | Incheon Bus Terminal<br>at 8:20 am    | Seongnam Bus Terminal<br>at 9:27 am  | 44 km                |
| BUS2-2               | Off                     | 4/29                       | Incheon Bus Terminal<br>at 9:20 am    | Seongnam Bus Terminal<br>at 10:52 am | 44 km                |
| BUS3-1               | On                      | 4/6                        | Pyeongtaek Bus Terminal<br>at 9:00 am | Yangjae Station<br>at 10:52 am       | 66 km                |
| BUS3-2               | Off                     | 4/6                        | Pyeongtaek Bus Terminal<br>at 8:30 am | Yangjae Station<br>at 10:33 am       | 66 km                |

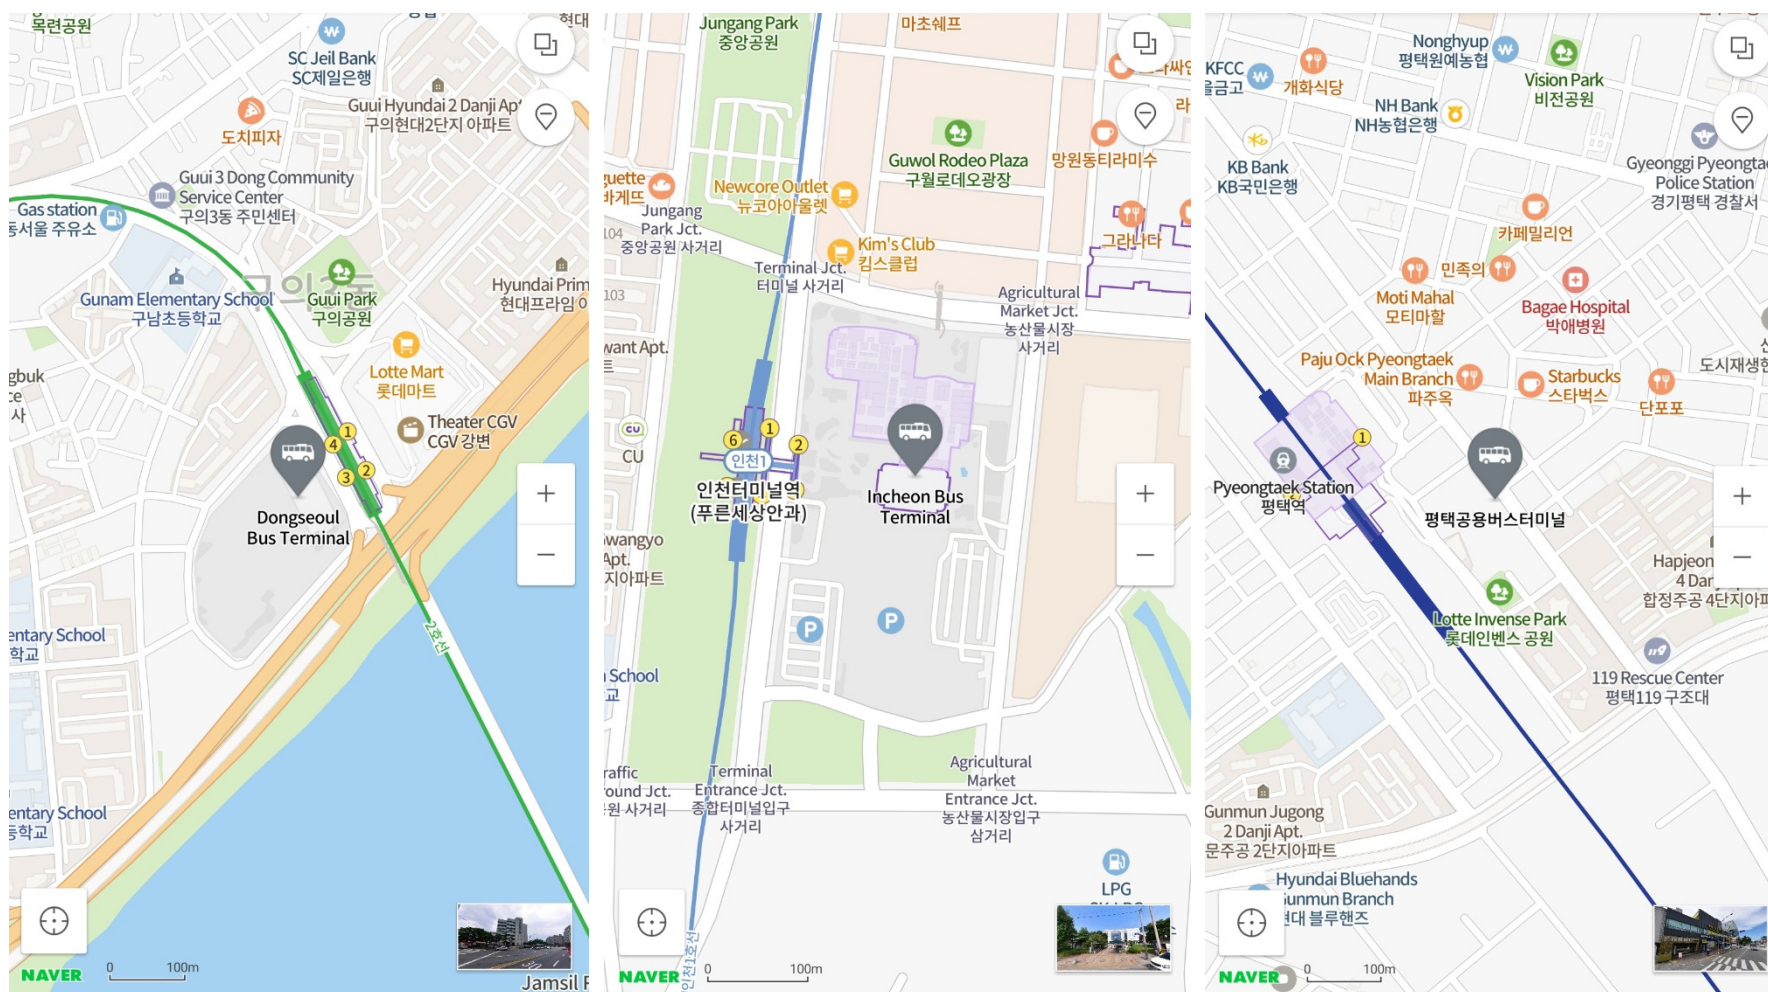

**Figure S3.** The maps of departing bus terminals for each intercity bus route (from NAVER maps). Parks are shown in green. See Table S1 for mapping the departing terminals and buses.

1  
2  
3
